# Supplementary material
Source: publisher figshare collection journal article supplement (https://karger.figshare.com/ndownloader/files/26251504)
Supplement: Supplementary file 1 [file 26251504]

**Table S1: A summary of the key words and search strategy to identify the top 100 articles from the Clarivate Analytics Web of Science Core Collection database**

**#1:** TOPIC: (Liver Neoplasm) OR TOPIC: (Hepatic Neoplasm) OR TOPIC: (Liver Cancer) OR TOPIC: (Hepatic Cancer) OR TOPIC: (Liver tumor) OR TOPIC: (Hepatic tumor) OR TOPIC: (Hepatocellular Cancer) OR TOPIC: (Hepatocellular Carcinoma) OR TOPIC: (HCC) OR TOPIC: (Hepatoma) OR TOPIC: (Liver malignancy) OR TOPIC: (liver malignant tumor)

**#2:** TOPIC: (Therapeutic) OR TOPIC: (Therapy) OR TOPIC: (Treat) OR TOPIC: (Treatment) OR TOPIC: (Management) OR TOPIC: (Surgery) OR TOPIC: (Surgical) OR TOPIC: (Operate) OR TOPIC: (operation) OR TOPIC: (resection) OR TOPIC: (hepatectomy) OR TOPIC: (liver resection) OR TOPIC: (Liver Transplantation) OR TOPIC: (Transcatheter arterial chemoembolization) OR TOPIC: (Transarterial chemoembolization) OR TOPIC: (TACE) OR TOPIC: (Transarterial embolism) OR TOPIC: (TAE) OR TOPIC: (HAI) OR TOPIC: (Hepatic arterial infusion chemotherapy) OR TOPIC: (Ablation) OR TOPIC: (Radiofrequency ablation) OR TOPIC: (Microwave ablation) OR TOPIC: (RFA) OR TOPIC: (Immunotherapy) OR TOPIC: (Chimeric Antigen Receptor T-Cell Immunotherapy) OR TOPIC: (Vaccine) OR TOPIC: (Targeted therapy) OR TOPIC: (Molecular Therapy) OR TOPIC: (Chemotherapy) OR TOPIC: (Adjuvant Therapy) OR TOPIC: (Radiotherapy) OR TOPIC: (External Radiotherapy) OR TOPIC: (Internal Radiotherapy) OR TOPIC: (Stereotactic Body Radiation Therapy) OR TOPIC: (Selective Internal Radiation Therapy) OR TOPIC: (SBRT) OR TOPIC: (SIRT) OR TOPIC: (Transarterial radioembolization) OR TOPIC: (Yttrium 90) OR TOPIC: (TARE) OR TOPIC: (Y-90) OR TOPIC: (CAR-T) OR TOPIC: (imaging) OR TOPIC: (Computed tomography) OR TOPIC: (CT) OR TOPIC: (Magnetic resonance imaging) OR TOPIC: (MRI) OR TOPIC: (Positron emission tomography) OR TOPIC: (PET) OR TOPIC: (ultrasound)

**#3:** #1 AND #2

Indexes=SCI-EXPANDED, CPCI-S.

Timespan= From January 1980 to November 2020.

Note: SCI-EXPANDED, Science Citation Index Expanded; CPCI-S, Conference Proceedings Citation Index- Science.
